## MS<sup>2</sup>PIP: a tool for MS/MS peak intensity prediction

Sven Degroeve<sup>1,2,\*</sup> and Lennart Martens<sup>1,2</sup><sup>1</sup>Department of Medical Protein Research, VIB, Ghent 9000, Belgium and <sup>2</sup>Department of Biochemistry, Ghent University, Ghent 9000, Belgium

Associate Editor: Igor Jurisica

### ABSTRACT

**Motivation:** Tandem mass spectrometry provides the means to match mass spectrometry signal observations with the chemical entities that generated them. The technology produces signal spectra that contain information about the chemical dissociation pattern of a peptide that was forced to fragment using methods like collision-induced dissociation. The ability to predict these MS<sup>2</sup> signals and to understand this fragmentation process is important for sensitive high-throughput proteomics research.

**Results:** We present a new tool called MS<sup>2</sup>PIP for predicting the intensity of the most important fragment ion signal peaks from a peptide sequence. MS<sup>2</sup>PIP pre-processes a large dataset with confident peptide-to-spectrum matches to facilitate data-driven model induction using a random forest regression learning algorithm. The intensity predictions of MS<sup>2</sup>PIP were evaluated on several independent evaluation sets and found to correlate significantly better with the observed fragment-ion intensities as compared with the current state-of-the-art PeptideART tool.

**Availability:** MS<sup>2</sup>PIP code is available for both training and predicting at <http://compomics.com/>.

**Contact:** sven.degroeve@UGent.be

**Supplementary information:** Supplementary data are available at *Bioinformatics* online.

Received on June 12, 2013; revised on September 11, 2013; accepted on September 13, 2013

### 1 INTRODUCTION

Mass spectrometry (MS) allows for high-throughput protein content measurements in samples by identifying and quantifying proteins in the form of digested peptide sequences. Tandem mass spectrometry (MS<sup>2</sup>) provides the means to match MS signal observations with the chemical entities that generated them. MS<sup>2</sup> produces signal spectra that contain information about the chemical dissociation pattern of a peptide that was forced to fragment using methods like ‘collision induced dissociation’ (CID). The signal peaks in an MS<sup>2</sup> spectrum indicate the presence of a peptide fragment ion with a specific mass. The intensity of a signal peak is dependent on a number of factors: the abundance of the peptide in the sample, the efficiency of the cleavage that generated the fragment, the proteotypicity of the fragment ion and other factors related to the peptide and the machine that generated the MS<sup>2</sup> spectrum (Barton and Whittaker, 2009).

Popular peptide identification tools such as Mascot (Perkins *et al.*, 1999), OMSSA (Geer *et al.*, 2004) and X!Tandem (Craig

and Beavis, 2004) assume that MS<sup>2</sup> peaks for the most important fragment ions have a high intensity, and that fragment ions of different types have the same high intensity. Without an accurate model of the relationship between the amino acid composition of the peptide and the peak intensities in the corresponding MS<sup>2</sup> spectrum, these *ad hoc* approaches fail to match fragment ions for which low intensity peaks are expected to be observed. It has been shown that incorporating knowledge about this relationship between peak intensity and amino acid composition significantly improves peptide identification rates (Narasimhan *et al.*, 2005; Sadygov *et al.*, 2006; Tabb *et al.*, 2007).

Despite the apparent need for accurate MS<sup>2</sup> signal peak intensity predictions from amino acid sequences, only few attempts have been published. A first approach, the MassAnalyzer tool (Zhang, 2004, 2005), was a deductive physicochemical model of peptide fragmentation. All parameters in the model were optimized on a dataset containing 8900 MS<sup>2</sup> spectra with confident peptide match (PSM). The authors showed that MassAnalyzer models MS<sup>2</sup> peak intensities more accurately as compared with *ad hoc* methods. At the same time, an inductive Bayesian decision tree approach was introduced (Elias *et al.*, 2004). This research showed that a decision tree model representation is highly suitable for learning the diverse set of rules that govern peptide fragmentation. Their data-driven approach was able to visualize, from 27.000 PSMs, many of the known fragmentation rules and discovered several new ones. However, their approach does not model the peak intensities directly. Rather it models the probability of observing a certain fragment ion intensity. A similar study based on Bayesian neural networks was presented in Zhou *et al.* (2008) with a dataset of 13.900 PSMs.

Another inductive approach called PeptideART (Arnold *et al.*, 2006) is based on feed-forward neural network representations. It implements an ensemble of neural networks that each models the most important fragment ion peak intensities in one multi-output feed-forward neural network. This method models the (normalized) peak intensities directly. The features used as input to the neural network are similar to ones suggested by Elias *et al.* The authors reported a systematic assessment of the accuracy of the current peptide MS/MS spectrum predictors for the most commonly used collision-induced dissociation instruments (Li *et al.*, 2011). They found that PeptideART achieves generally higher accuracy on a wide range of proteomic datasets when trained on a dataset of 41.054 PSMs.

We show here that MS<sup>2</sup> signal peak intensity prediction can be significantly improved by exploiting the vast amount of PSM data that have been collected over the recent years. We constructed a dataset of 73.121 merged PSMs and present an

\*To whom correspondence should be addressed.

inductive learning approach for peak intensity regression that exploits all of the information contained in this large number of PSMs. Our approach still uses the non-linear decision tree representation for training the peak intensity prediction models. Both training and prediction procedures are implemented in a freely available tool called MS<sup>2</sup> Peak Intensity Prediction, or MS<sup>2</sup>PIP.

## 2 METHODS

### 2.1 Training dataset

A total of 3,965,456 OrbiTrap PSMs identified as true matches in 619 proteomics experiments (obtained by sampling human, mouse and rat as well as many plant and bacterial species) were queried from the ms-lims database (Helsens *et al.*, 2010) of the proteome analysis and bioinformatics unit of Ghent University. All PSMs were scored as non-random matches by the Mascot search engine (versions ranging from 2.1.02 to 2.3.01) with allowed error rate estimates from 1 to 5%. We refer to this PSM data as the training dataset  $D$ . Signal peak intensities are normalized within each MS<sup>2</sup> spectrum such that we can compare these intensities between spectra. All peak intensities within a spectrum were divided by the sum of all peak intensities of that spectrum, i.e. normalization to total ion current (Degroeve *et al.*, 2011). All intensities are log<sub>2</sub> transformed.

### 2.2 Evaluation datasets

Several publicly available MS<sup>2</sup> sample processing experiments, all performed on LTQ-OrbiTrap type instruments, were used for evaluating the intensity prediction models obtained from the training data. None of these data were generated by the Proteome Analysis and Bioinformatics Unit of Ghent University. The first set of processed samples was obtained from a study of the NCI funded Clinical Proteomic Technology Assessment for Cancer (CPTAC) Network (Paulovich *et al.*, 2010). Herein, six digested yeast samples were analyzed by three different laboratories to generate the corresponding MS<sup>2</sup> spectra. For each laboratory, we make one evaluation dataset that contains all PSMs of the six proteomic experiments.

We will refer to these datasets as *lab1*, *lab2* and *lab3*. The second set of processed samples originates from The Proteome Informatics Research Group (iPRG) of the Association of Biomolecular Resource Facilities and their 2009 study. This study used two different *E. coli* lysate samples, each processed as five technical replicates. We create two evaluation datasets, *sample1* and *sample2*, each containing the respective PSMs for all five replicates.

All MS<sup>2</sup> spectra were searched with the Mascot peptide identification engine and post-processed by the Percolator PSM rescoring tool to produce PSMs with high confidence (FDR < 0.01). The number of PSMs in each evaluation dataset is shown in Table 1.

### 2.3 Data processing

Our key idea is to partition the dataset  $D$  into disjoint subsets that represent regression learning tasks that are easier to solve by a machine learning method. This is possible by exploiting the vast amount of PSM training data available to us. As different PSM charge states  $c$  are known to fragment differently, dataset  $D$  is first partitioned based on the charge state of the PSM. In this research, we consider the most important charge states +2 and +3. We refer to these PSM datasets as  $D_c$  with  $c \in \{+2, +3\}$ . It is worth noting that the separate analysis of different peptide charge states has already been shown to be useful in identification results validation (Vaudel *et al.*, 2011).

We take this one step further by partitioning each dataset  $D_c$  based on the peptide length  $l$  of the PSM. For this, we consider peptide lengths from 8 to 28 amino acids based on the typical lengths of identified

**Table 1.** The number PSMs in the CPTAC and iPRG evaluation datasets

| Dataset | Charge +2 | Charge +3 |
|---------|-----------|-----------|
| Lab1    | 42 774    | 4435      |
| Lab2    | 59 751    | 21 263    |
| Lab3    | 42 174    | 15 808    |
| Sample1 | 11 191    | 5114      |
| Sample2 | 12 005    | 5428      |

peptides (Vandermarliere *et al.*, 2013). As a result, we now have partitioned  $D$  into  $D_{cl}$  with  $c \in \{+2, +3\}$  and  $l \in [8, 28]$ . As explained further, this will greatly simplify the representation of the PSMs by feature vectors, and therefore make it easier for a machine learning method to learn an accurate regression model.

To apply a machine learning method on the datasets  $D_{cl}$  we need to compile each PSM into a feature vector and label that vector with a target for the regression. Table 2 lists the features we used to represent a PSM. These include previously described features (Elias *et al.*, 2004) such as the mass-to-charge ratio of the peptide sequence and the two fragment ions as well as average values for different chemical properties of the amino acids in a peptide or fragment ion. Also, the amino acid composition is taken into account by counting the number of times each amino acid appears in the peptide (feature  $I_L$ ). The features ( $seq\_<pos>\_x$ ) are new and can only be computed because we partitioned the training data based on the length  $l$  of the peptide. These features capture information from all positions in the amino acid sequence, not just from the positions in proximity to the cleavage site. For each position, we compute features that represent the presence of a specific, potentially modified amino acid. Similarly we compute features that contain the value of several chemical amino acid properties for each position in the peptide sequence.

In this research, we build regression models for all the  $b_i$ ,  $b_{++i}$ ,  $b-H_2O_i$ ,  $b-NH_{3i}$ ,  $b_{++-H_2O_i}$ ,  $b_{++-NH_{3i}}$ ,  $y_i$ ,  $y_{++i}$ ,  $y-H_2O_i$ ,  $y-NH_{3i}$ ,  $y_{++-H_2O_i}$  and  $y_{++-NH_{3i}}$  fragment ions with  $i$  ranging from 1 to  $l-1$  for a peptide of length  $l$ . We will refer to this set of fragment ions as  $frag(l)$ . Each ion is searched for in the MS<sup>2</sup> spectra with a 0.8 Da error tolerance. If >1 signal peak is observed within the constructed error window, then the peak with the highest intensity is selected as the matching peak. For each fragment ion  $f \in frag(l)$ , a training dataset  $D_{c,f}$  is compiled that contains all PSMs with charge  $c$  and peptide length  $l$  and with the observed peak intensities for fragment ion  $f$  as targets for the regression. Just as for  $c$  and  $l$ , we here build separate models for each  $f \in frag(l)$ .

Each dataset  $D_{cl}$  contains PSMs with the exact same peptide sequence and charge, but with different experimental MS<sup>2</sup> spectra. Instead of representing these PSMs as different feature vectors, we merged these spectra by computing the median intensity for each  $f \in frag(l)$  and computed only one feature vector from the merged PSMs. This reduces experiment induced intensity variance and limits the negative impact of outlying PSMs, i.e. PSMs not correctly identified by Mascot. This is similar to the spectrum averaging techniques used in spectral libraries (Lam *et al.*, 2007).

To make spectrum merging meaningful, we removed all PSMs for which the peptide sequence is observed <10 times. This filter again reduces the impact of potentially incorrectly identified PSMs as such random matches are typically identified in only few experiments. Preferring to err on the side of caution, we assumed that many of these only occasionally observed identifications could be incorrect PSMs. The minimum threshold of 10 spectra identifying a peptide is selected as a balance between making the merging meaningful while still keeping enough PSM data for training the regression models. The number of non-redundant PSMs in each dataset  $D_{cl}$  is shown in Table 3.

**Table 2.** Features used to represent the PSMs in datasets  $D_{clf}$ 

| Feature           | Description                                                                                  |
|-------------------|----------------------------------------------------------------------------------------------|
| labeled           | Set to 1 if the peptide has an n-terminal label, 0 otherwise                                 |
| pep_mz            | Computed mass value of the peptide sequence                                                  |
| ion_mz            | Computed mass of the fragment ion $f$                                                        |
| ion_mz_other      | $Pep\_mz$ minus $ion\_mz$                                                                    |
| avg_<chem>        | Average of chemical property <chem> for all amino acids in the peptide                       |
| avg_<chem>_ion    | Average of chemical property <chem> for all amino acids in the fragment ion $f$              |
| I_                | Number of occurrences of the amino acid <amino> in the peptide sequence                      |
| seq_<pos>_        | Set to 1 if the amino acid at peptide sequence position <pos> is                             |
| seq_<pos>_<mod-a> | Set to 1 if the modified amino acid at peptide sequence position <pos> is                    |
| seq_<pos>_<chem>  | The value of the chemical property <chem> of the amino acid at position <pos> in the peptide |

Note: The different chemical properties <chem> are basicity, hydrophobicity, helicity and pI. The values are listed in Supplementary Table S1. The modified amino acids <mod-amino> in the training PSMs are C, K, M, N and R.

**Table 3.** The number of (merged) PSMs used in each dataset  $D_{cl}$ 

| Peptide length | Charge +2 | Charge +3 |
|----------------|-----------|-----------|
| 8              | 4972      | 40        |
| 9              | 6875      | 89        |
| 10             | 7627      | 155       |
| 11             | 7910      | 289       |
| 12             | 6855      | 355       |
| 13             | 5927      | 443       |
| 14             | 5131      | 615       |
| 15             | 4422      | 798       |
| 16             | 3633      | 951       |
| 17             | 2614      | 870       |
| 18             | 1900      | 895       |
| 19             | 1531      | 941       |
| 20             | 859       | 807       |
| 21             | 705       | 777       |
| 22             | 433       | 694       |
| 23             | 307       | 670       |
| 24             | 166       | 480       |
| 25             | 137       | 329       |
| 26             | 55        | 266       |
| 27             | 63        | 293       |
| 28             | 28        | 214       |
| Total          | 62 150    | 10 971    |

Remark that our spectrum merging approach is a way of removing redundant PSMs from the datasets. In previous approaches, non-redundant sets of PSMs were obtained by selecting the match with the highest quality (typically implemented as selecting the PSM with the highest Mascot score). However, by merging the observed peak intensities for all observed PSMs, we try to exploit much more information from the 3.965.456 spectra in our PSM dataset.

## 2.4 Regression model induction

Signal peak intensity prediction models were induced from the compiled training datasets using the random forests (RF) regression method (Breiman, 2001). This algorithm computes an ensemble of  $n_{tree}$  CART

regression trees in which each tree is constructed from  $m_{try}$  randomly sampled features. A peak intensity prediction is then computed as the average of the outputs of the regression trees in the forest.

Let  $m$  be the number of features in a training dataset  $D_{clf}$ , then all combinations of  $n_{tree} \in \{10, 20, 40, 60, 100, 140, 200\}$  and  $m_{try} \in \{\sqrt{m}, m/4, m/3, m/2, m/1.5\}$  are evaluated. The RF method uses an out-of-bag (oob) procedure that can be used to compute an unbiased estimate of the prediction performance. For each parameter combination, we induce a RF regression model and estimate the explained variance by computing the oob  $R^2$  as the mean-squared error divided by the variance of the original observations and subtracted from one. We used the ‘randomForest’ R library version 4.6.7 from the Comprehensive R Archive Network (CRAN) as the RF implementation.

## 3 RESULTS

### 3.1 Training RF regression models

Table 3 shows the number of vectors for each dataset  $D_{cl}$ . There are many more experimental PSMs with charge +2 as compared with charge +3 PSMs. For charge +2 PSMs, the peptide length  $l = 11$  is most likely to be observed, whereas for charge +3, this is  $l = 16$ . It is observed that training set sizes are different for the different regression tasks.

To investigate the regression target distribution in each dataset  $D_{clf}$ , we plotted the mean and standard deviation of this distribution for each dataset  $D_{clf}$  with  $f \in \{b, y\}$ . From this plot (Supplementary Fig. S1), we concluded that datasets  $D_{clf}$  with low mean intensity also have low variance. For these dataset, the signal peaks for fragment ion  $f$  are hardly ever observed, or they are in the noise. For these datasets, a baseline regression model that always predicts that no signal peak is observed will be hard to beat. So, for all datasets  $D_{clf}$  with a standard deviation of the regression target distribution smaller than 0.5, we do not induce an RF regression model but rather apply the baseline regression model.

Figure 1 shows the distribution of the oob  $R^2$  prediction performance results for b and y ion types. A more detailed visualization of the results can be found in Supplementary Figure S2. As known from previous research, learning charge +3 fragmentation rules is much harder than charge +2 rules. Because of this, the dataset D contains less charge +3 PSM examples, as it is

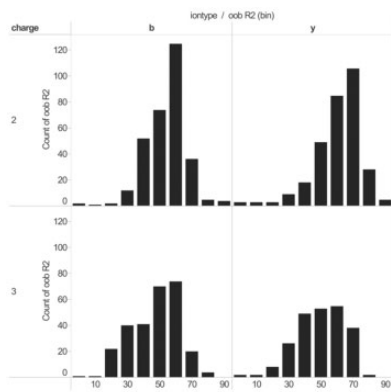

**Fig. 1.** The distribution of the oob  $R^2$  prediction performance results for the regression tasks  $D_{cif}$ , with  $f \in \{b, y\}$

harder for Mascot to assign the correct peptide in these cases. This is also reflected in the oob  $R^2$  results, as RF regression, in general, performs less accurately on the +3 PSM datasets. Supplementary Figures S3a and S3b show detailed results for all the fragment ion types considered in this research. These plots show the accuracy of the prediction models differs significantly between the different ion types, charge states and peptide lengths. For less prominent ion types, such as  $b++-H_2O$  and  $y+++NH_3$ , the accuracy of the intensity predictions is low for all peptides. The prediction models computed for the b and y ions were most accurate. The ion types  $b++$  and  $y++$  could be modeled accurately only for the charge +3 peptides. We could also observe a clear difference in accuracy between the different peptide lengths for these ion types: models for peptides with length between 11 and 17 are significantly more accurate as those for length 8 or 9.

### 3.2 Evaluating RF regression models

To estimate the true generalization performance of the trained RF regression models, they were applied to predict the fragment ion peak intensities in the PSMs of the evaluation datasets *lab1*, *lab2*, *lab3*, *sample1* and *sample2*.

For each test, PSM with charge state  $c$  and peptide length  $l$  the corresponding models  $D_{cif}$  are applied to predict the signal peak intensities of the fragment ions. Next, the Pearson product-moment correlation coefficient (PCC) between the observed and the predicted signal intensities is computed. For this evaluation, we considered four sets of fragment ions as show in Table 4. For *set1*, we considered b and y ions only. For *set2*, *set3* and *set4* more fragment ions are added to the computation of the PPC values.

The accuracy of the  $MS^2PIP$  predictions is compared with those computed by PeptideART version 2.1. This implementation has no specific parameters to be set by the user. We did transform the predictions made by PeptideART to  $\log_2$ -space.

Figure 2 shows the distribution of the PCC values computed from the b and y ion types (*set1*, Table 4) for the evaluation datasets *lab1*, *lab2*, *lab3*, *sample1* and *sample2*. Results for the  $MS^2PIP$  models are shown in dark gray, those for PeptideART in light gray. For the charge, +2 PSMs contributions are

**Table 4.** Different sets of fragment ions used for the evaluation of the performance of the peak intensity prediction models

| Set         | Fragment ions                                                                                                                        |
|-------------|--------------------------------------------------------------------------------------------------------------------------------------|
| <i>Set1</i> | $b_i, y_i$                                                                                                                           |
| <i>Set2</i> | $b_i, y_i, b_{++i}, y_{++i}$                                                                                                         |
| <i>Set3</i> | $b_i, y_i, b_{++i}, y_{++i}, b-H_2O_i, b-NH_{3i}, y-H_2O_i, y-NH_{3i}$                                                               |
| <i>Set4</i> | $b_i, y_i, b_{++i}, y_{++i}, b-H_2O_i, b-NH_{3i}, y-H_2O_i, y-NH_{3i}, b_{+++}H_2O_i, b_{+++}NH_{3i}, y_{+++}H_2O_i, y_{+++}NH_{3i}$ |

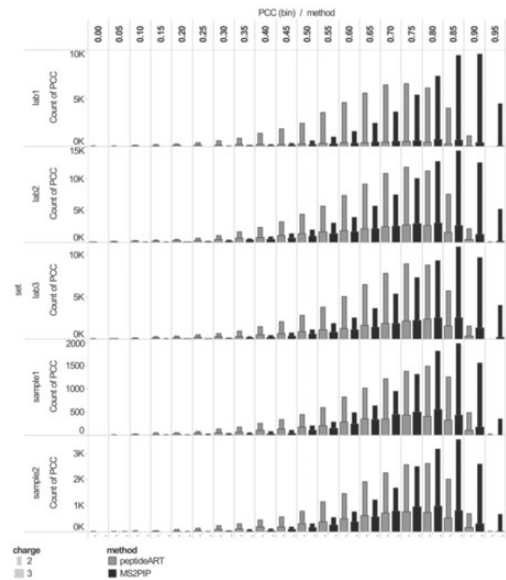

**Fig. 2.** The distribution of the PCC values computed from the b and y ion types (*set1*) for the evaluation datasets *lab1*, *lab2*, *lab3*, *sample1* and *sample2*

represented as the smaller bars. As concluded from the training datasets oob performance, prediction charge +2 PSMs models are more accurate than charge +3 models. Overall, the distributions clearly show that  $MS^2PIP$  is significantly more accurate in predicting signal peak intensities for the PSMs considered in this research as compared with PeptideART.

Supplementary Figure S4 shows the results for all fragment ion sets from Table 4. The plot shows how  $MS^2PIP$  consistently computes more accurate peak intensity predictions for these sets as compared with PeptideART. We also observe how the overall correlation between the observed and predicted fragmentation ion peaks for a spectrum decreases as more of the less prominent fragment ion types are included in the computation of the PPC.

In Supplementary Figure S5a–S5e, we plotted the PPC results for *set1* as box-plots for each peptide length  $l$  and charge state  $c$ . Now the performance difference between PeptideART and  $MS^2PIP$  becomes clearer. For both methods, predicting the peak intensities in the longer peptides (from  $\sim 23$  amino acids) is problematic for several evaluation sets. We observe this for both charge +2 and +3 peptides. However, for the shorter peptides (up to length 13), the  $MS^2PIP$  models perform significantly



better. This is somewhat surprising for the charge +3 models as these were trained relatively small datasets (Table 3). A final observation is that these conclusions are consistent for all evaluation sets.

#### 4 CONCLUSIONS

MS<sup>2</sup>PIP is a tool that implements a number of new techniques for the induction of MS<sup>2</sup> signal peak intensity prediction models. First, following the conclusion made by (Elias *et al.*, 2004) that decision tree representations are suitable for learning peptide fragmentation rules, MS<sup>2</sup>PIP applies a RF regression learning algorithm for constructing the prediction models. Second, the vast amount of available PSM data accumulated over the recent years allows MS<sup>2</sup>PIP to partition this PSM data to facilitate the construction of feature vectors from peptide sequences. Third, MS<sup>2</sup>PIP merges PSM data to reduce dataset sizes while still preserving the relevant intensity information contained in all PSMs.

The main conclusions we want to make from this research are the following. First, MS<sup>2</sup>PIP shows superior prediction performance for the fragment ion peak intensities considered in this research as compared with the neural network based PeptideART prediction tool. Second, MS<sup>2</sup>PIP and PeptideART both are significantly less accurate for the longer peptides, although MS<sup>2</sup>PIP is far more accurate than PeptideART for the smaller peptides. Third, the accuracy of the models differs significantly between the different fragment ion types. For less prominent ion types such as b<sup>++</sup>-H<sub>2</sub>O and y<sup>+++</sup>-NH<sub>3</sub>, the accuracy of the intensity predictions is low for both tools. The prediction models computed for the b and y ions were most accurate. The ion types b<sup>++</sup> and y<sup>++</sup> could be modeled accurately only for the charge +3 peptides.

Although additional research needs to be performed, we believe the main contribution of MS<sup>2</sup>PIP to the increased accuracy observed for MS<sup>2</sup> signal peak intensity prediction is the splitting of the PSM data based on charge state, peptide length and fragment ion type, making the learning task easier for the RF regression method. The observation that MS<sup>2</sup>PIP is far more accurate for the smaller peptides provides a strong indication for this statement.

In addition, our publicly available MS<sup>2</sup>PIP implementation allows for building peak intensity prediction models for all other types of fragment ions as well.

**Funding:** The seventh framework program of the European Union (Contract no. 262067- PRIME-XS) and by Ghent University (multidisciplinary research partnership ‘Bioinformatics: from nucleotides to networks’). IWT SBO grant ‘INSPECTOR’ (120025)

(in part). Computations were performed on the Stevin Supercomputer Infrastructure at Ghent University, funded by Ghent University, the Hercules Foundation and the Flemish Government.

*Conflicts of Interest:* none declared.

#### REFERENCES

- Arnold, R.J. *et al.* (2006) A machine learning approach to predicting peptide fragmentation spectra. In: *Pacific Symposium on Biocomputing*. pp. 219–230.
- Barton, S.J. and Whittaker, J.C. (2009) Review of factors that influence the abundance of ions produced in a tandem mass spectrometer and statistical methods for discovering these factors. *Mass Spectrom. Rev.*, **28**, 177–187.
- Breiman, L. (2001) Random Forests. *Machine Learning*, **45**, 5–32.
- Craig, R. and Beavis, R.C. (2004) TANDEM: matching proteins with tandem mass spectra. *Bioinformatics*, **20**, 1466–1467.
- Degroeve, S. *et al.* (2011) A reproducibility-based evaluation procedure for quantifying the differences between MS/MS peak intensity normalization methods. *Proteomics*, **11**, 1172–1180.
- Elias, J.E. *et al.* (2004) Intensity-based protein identification by machine learning from a library of tandem mass spectra. *Nat. Biotechnol.*, **22**, 214–219.
- Geer, L.Y. *et al.* (2004) Open mass spectrometry search algorithm. *J. Proteome Res.*, **3**, 958–964.
- Helsens, K. *et al.* (2010) ms\_lims, a simple yet powerful open source laboratory information management system for MS-driven proteomics. *Proteomics*, **10**, 1261–1264.
- Lam, H. *et al.* (2007) Development and validation of a spectral library searching method for peptide identification from MS/MS. *Proteomics*, **7**, 655–667.
- Li, S. *et al.* (2011) On the accuracy and limits of peptide fragmentation spectrum prediction. *Anal. Chem.*, **83**, 790–796.
- Narasimhan, C. *et al.* (2005) MASPIC: intensity-based tandem mass spectrometry scoring scheme that improves peptide identification at high confidence. *Anal. Chem.*, **77**, 7581–7593.
- Paulovich, A.G. *et al.* (2010) Interlaboratory study characterizing a yeast performance standard for benchmarking LC-MS platform performance. *Mol. Cell. Proteomics*, **9**, 242–254.
- Perkins, D.N. *et al.* (1999) Probability-based protein identification by searching sequence databases using mass spectrometry data. *Electrophoresis*, **20**, 3551–3567.
- Sadygov, R. *et al.* (2006) Central limit theorem as an approximation for intensity-based scoring function. *Anal. Chem.*, **78**, 89–95.
- Tabb, D.L. *et al.* (2007) MyriMatch: highly accurate tandem mass spectral peptide identification by multivariate hypergeometric analysis. *J. Proteome Res.*, **6**, 654–661.
- Vandermarliere, E. *et al.* (2013) Getting intimate with trypsin, the leading protease in proteomics. *Mass Spectrom. Rev.*, [Epub ahead of print, doi: 10.1002/mas.21376, June 15, 2013].
- Vaudel, M. *et al.* (2011) Peptide identification quality control. *Proteomics*, **11**, 2105–2114.
- Zhang, Z. (2004) Prediction of low-energy collision-induced dissociation spectra of peptides. *Anal. Chem.*, **76**, 3908–3922.
- Zhang, Z. (2005) Prediction of low-energy collision-induced dissociation spectra of peptides with three or more charges. *Anal. Chem.*, **77**, 6364–6373.
- Zhou, C. *et al.* (2008) A machine learning approach to explore the spectra intensity pattern of peptides using tandem mass spectrometry data. *BMC Bioinformatics*, **9**, 325.
